# Supplementary material
Source: PubMed Central journal article supplement (PMC4370317)
Supplement: NIHMS481050-supplement-1.pdf [file NIHMS481050-supplement-1.pdf]

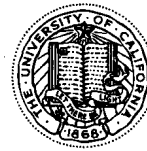

DIVISION OF HEMATOLOGY AND ONCOLOGY  
DEPARTMENT OF INTERNAL MEDICINE  
UNIVERSITY OF CALIFORNIA DAVIS CANCER CENTER  
4501 X STREET, SUITE 3016  
SACRAMENTO, CALIFORNIA 95817  
TELEPHONE (916) 734-3772  
FAX: (916) 734-7946

SACRAMENTO, CALIFORNIA 95817

April 22, 2013

RE: permission letter to quote personal communication in manuscript MCT-12-1029R

I authorize Dr. Goldkorn, corresponding author of the article MCT-12-1029R, entitled "**Src mediates cigarette smoke-induced resistance to tyrosine kinase inhibitors in NSCLC cells**" to quote our personal communication related to lung cancer patients responsiveness to TKI therapy (listed as Ref. 20).

Sincerely,

A handwritten signature in cursive script that reads "Primo N. Lara, Jr.".

Primo N. Lara, Jr., MD  
Professor of Medicine  
Associate Director for Translational Research  
Division of Hematology and Oncology  
UC Davis School of Medicine
